# Supplementary material
Source: MDPI journal article supplement (https://www.mdpi.com/2073-4395/12/2/235)
Supplement: s1 [file s1]

| Strain               | Streptomycin sulphate |        | Cu(OH) <sub>2</sub> |         | Cu <sub>2</sub> (OH) <sub>3</sub> Cl |         |
|----------------------|-----------------------|--------|---------------------|---------|--------------------------------------|---------|
|                      | 25 ppm                | 50 ppm | 100 ppm             | 200 ppm | 100 ppm                              | 200 ppm |
| KFB <sup>a</sup> 340 | (+)                   | -      | -                   | -       | -                                    | -       |
| KFB 341              | (+)                   | -      | -                   | -       | -                                    | -       |
| KFB 342              | -                     | -      | -                   | -       | -                                    | -       |
| KFB 343              | -                     | -      | -                   | -       | -                                    | -       |
| KFB 344              | -                     | -      | -                   | -       | -                                    | -       |
| KFB 345              | -                     | -      | -                   | -       | -                                    | -       |
| KFB 346              | (+)                   | -      | -                   | -       | -                                    | -       |
| KFB 347              | (+)                   | (+)    | -                   | -       | -                                    | -       |
| KFB 348              | (+)                   | (+)    | -                   | -       | -                                    | -       |
| KFB 349              | -                     | -      | -                   | -       | -                                    | -       |
| KFB 350              | -                     | -      | -                   | -       | -                                    | -       |
| KFB 351              | -                     | -      | -                   | -       | -                                    | -       |
| KFB 352              | (+)                   | (+)    | -                   | -       | -                                    | -       |
| KFB 365              | (+)                   | -      | -                   | -       | -                                    | -       |
| KFB 366              | -                     | -      | -                   | -       | -                                    | -       |
| KFB 367              | (+)                   | -      | -                   | -       | -                                    | -       |
| KFB 368              | -                     | -      | +                   | (+)     | +                                    | -       |
| KFB 369              | -                     | -      | -                   | -       | -                                    | -       |
| KFB 370              | (+)                   | -      | -                   | -       | -                                    | -       |
| KFB 371              | -                     | -      | -                   | -       | -                                    | -       |
| KFB 372              | -                     | -      | -                   | -       | -                                    | -       |
| KBI <sup>b</sup> 76  | -                     | -      | -                   | -       | -                                    | -       |
| KBI 77               | (+)                   | -      | -                   | -       | -                                    | -       |
| KBI 78               | -                     | -      | -                   | -       | -                                    | -       |
| KBI 79               | (+)                   | -      | -                   | -       | -                                    | -       |
| KBI 80               | -                     | -      | -                   | -       | -                                    | -       |
| KBI 81               | -                     | -      | -                   | -       | -                                    | -       |
| KBI 82               | (+)                   | (+)    | -                   | -       | -                                    | -       |
| KBI 83               | (+)                   | -      | -                   | -       | -                                    | -       |
| KBI 84               | -                     | -      | -                   | -       | -                                    | -       |
| KBI 85               | (+)                   | (+)    | -                   | -       | -                                    | -       |
| KBI 86               | (+)                   | -      | -                   | -       | -                                    | -       |
| KBI 340              | (+)                   | -      | -                   | -       | -                                    | -       |
| KBI 341              | -                     | -      | -                   | -       | -                                    | -       |
| KBI 342              | -                     | -      | -                   | -       | -                                    | -       |
| KBI 343              | -                     | -      | -                   | -       | -                                    | -       |
| KBI 344              | -                     | -      | -                   | -       | -                                    | -       |
| KBI 345              | -                     | -      | -                   | -       | -                                    | -       |
| KBI 346              | -                     | -      | -                   | -       | -                                    | -       |
| KBI 347              | -                     | -      | -                   | -       | -                                    | -       |
| KBI 348              | -                     | -      | -                   | -       | -                                    | -       |
| KBI 349              | -                     | -      | -                   | -       | -                                    | -       |
| KBI 350              | (+)                   | -      | -                   | -       | -                                    | -       |

<sup>a</sup> KFB- Collection of Phytopathogenic Bacteria, University of Belgrade, Faculty of Agriculture, Serbia;

<sup>b</sup> KBI- Collection of Bacteria, Institute for Plant Protection and Environment, Belgrade, Serbia; + colony growth; (+) weak colony growth; - no colony growth.
