# Supplementary material
Source: MDPI journal article supplement (https://www.mdpi.com/2073-4395/12/2/235)

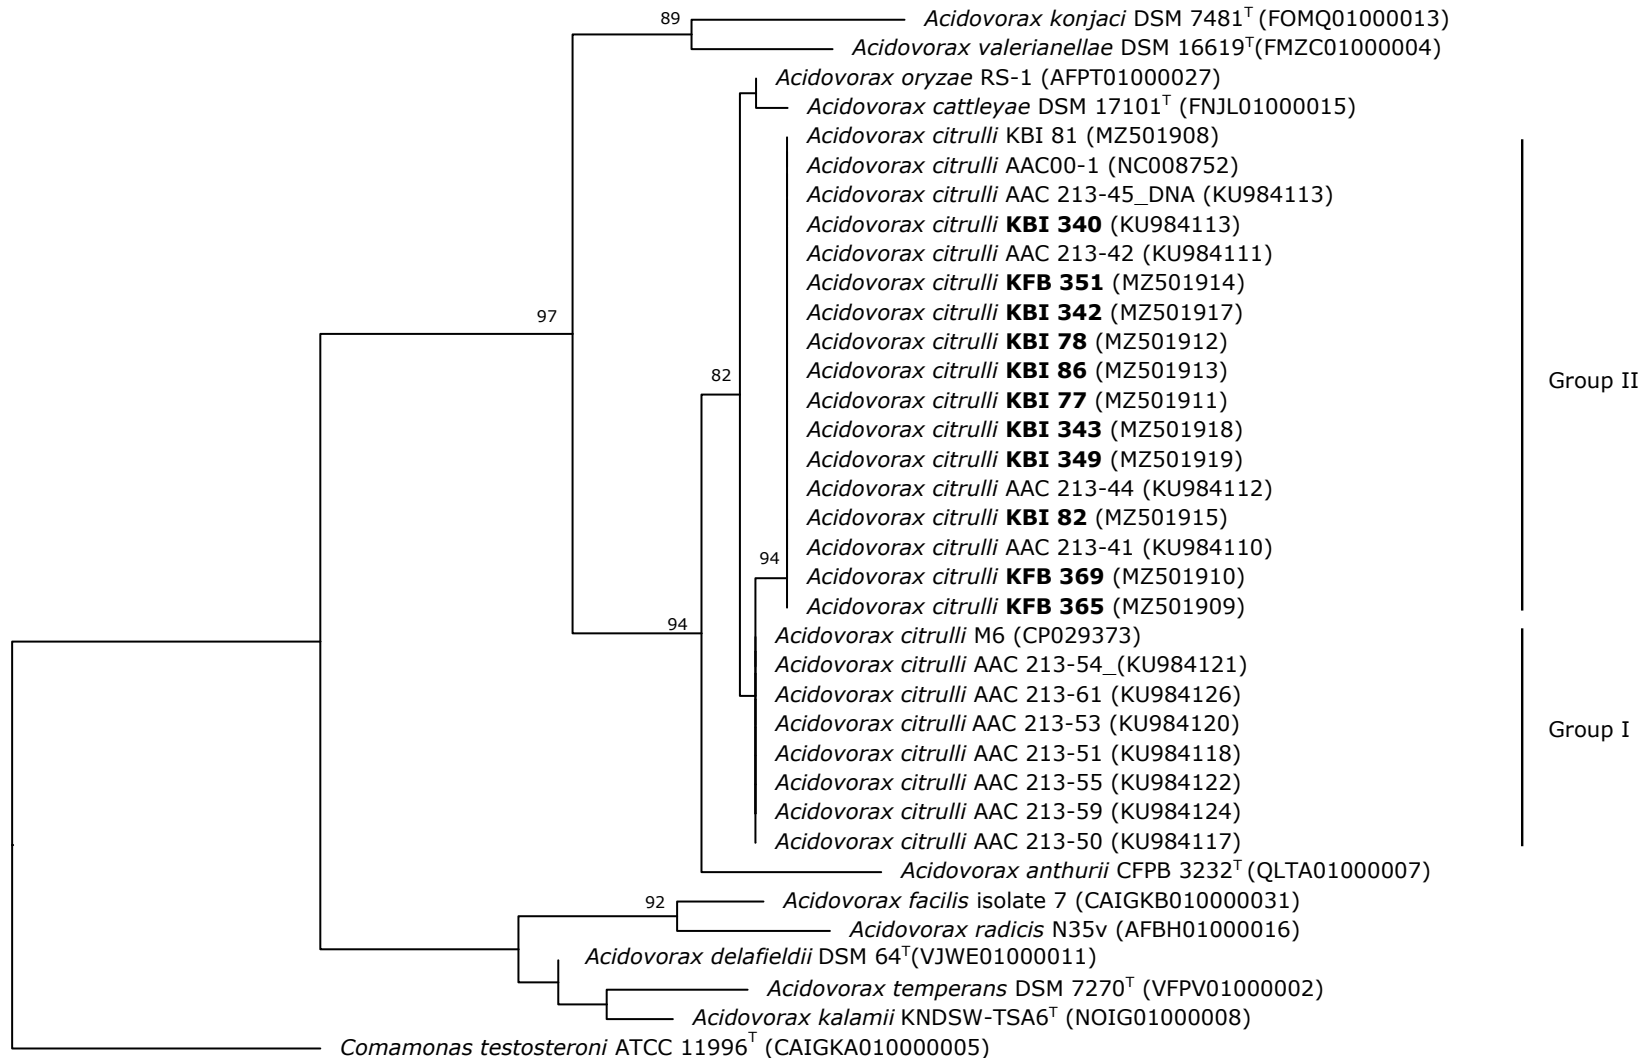

0.02

Supplement: s1 [file s1]

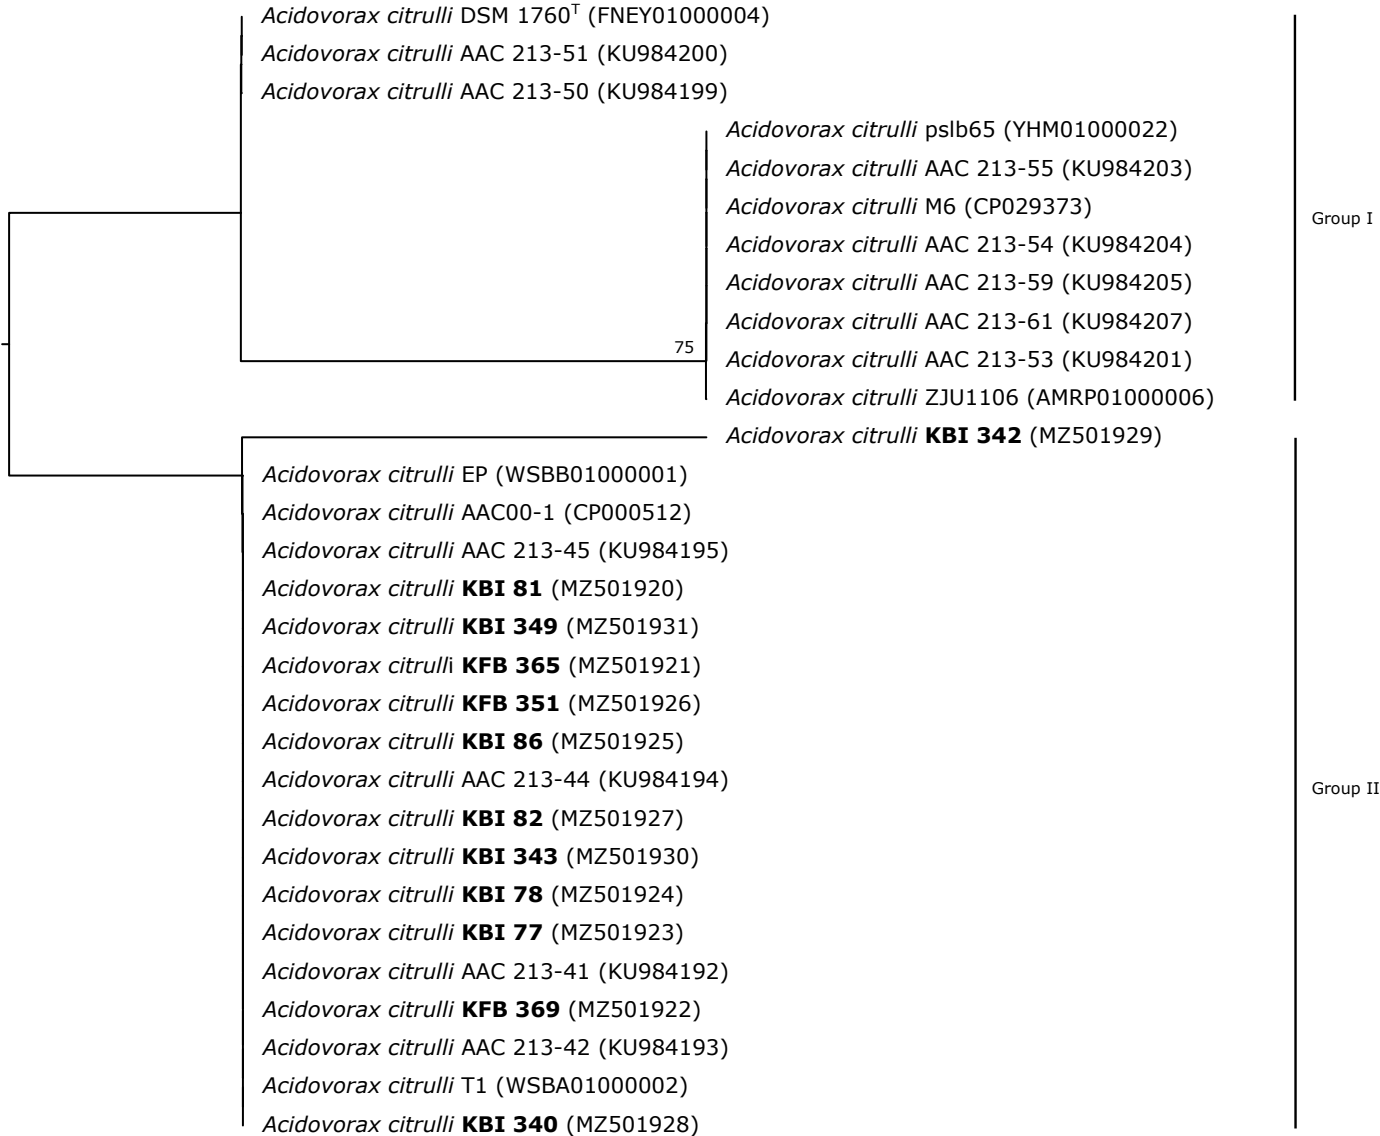

Supplement: s1 [file s1]

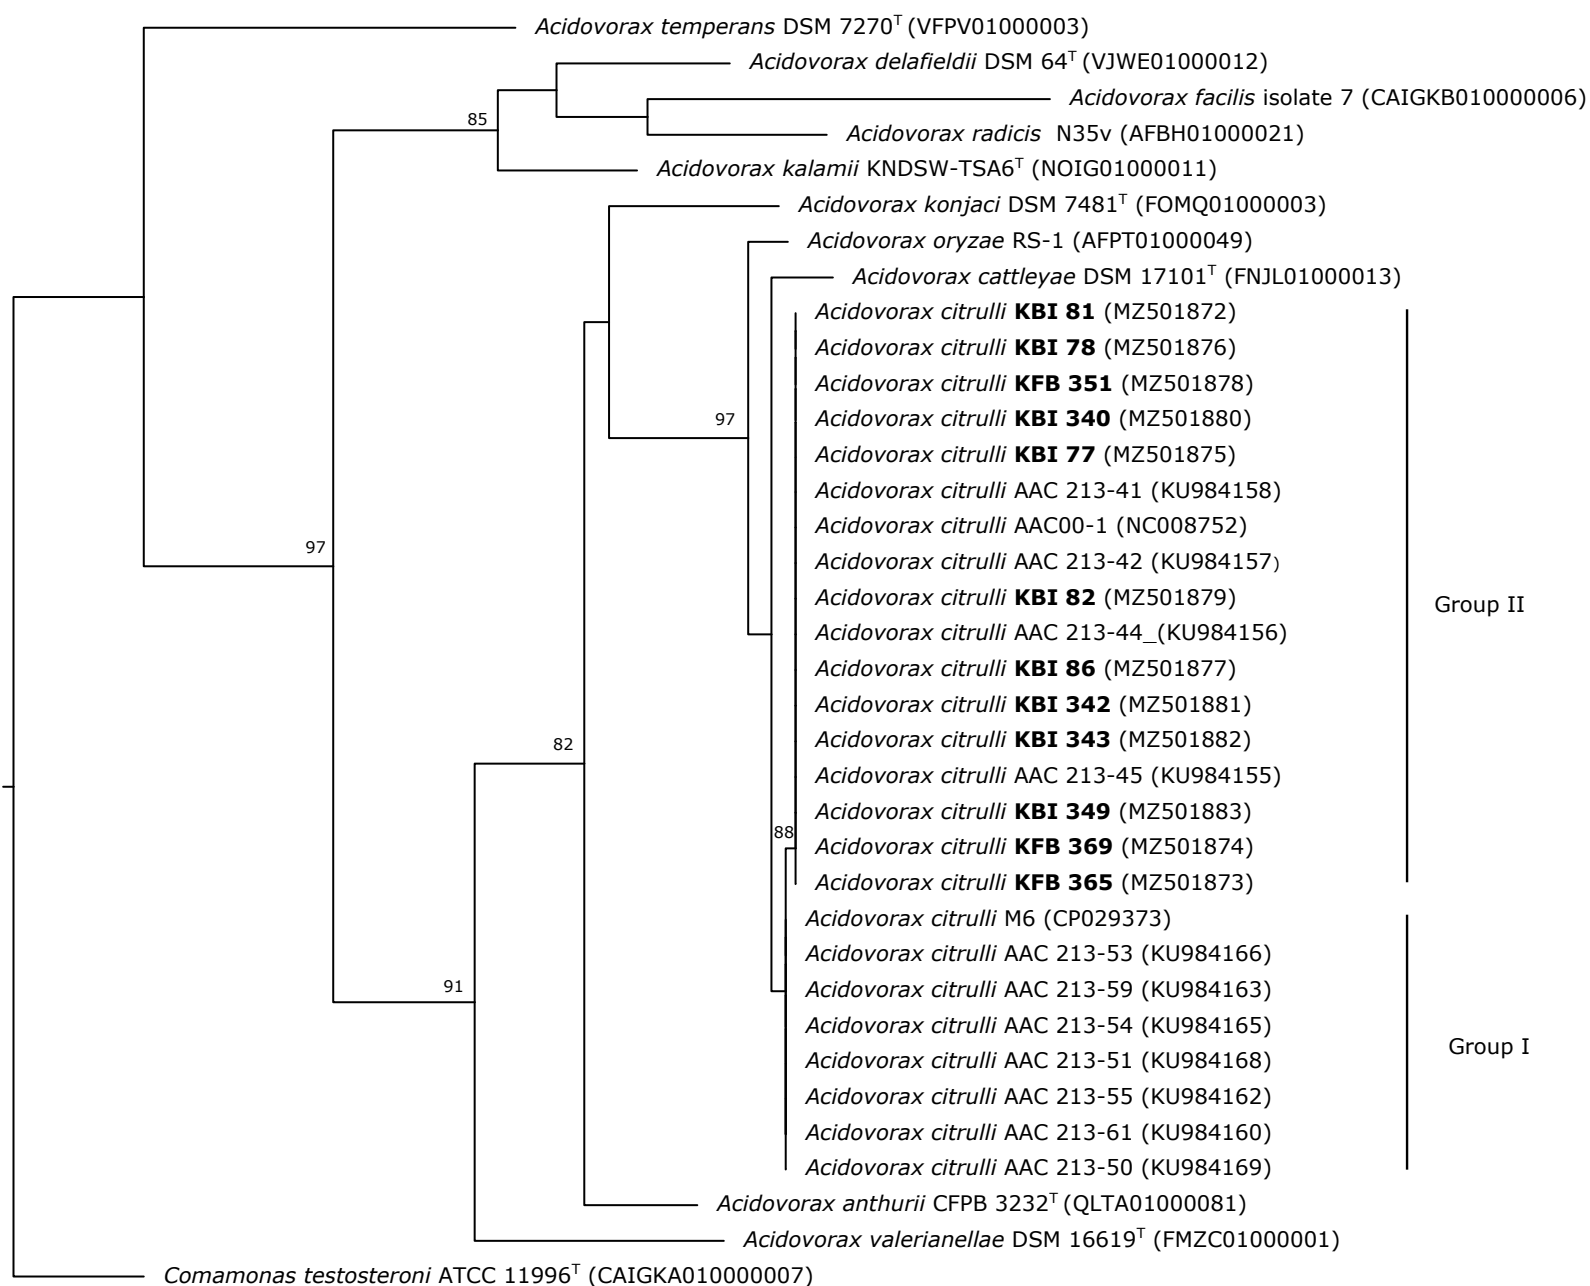

0.03

Supplement: s1 [file s1]

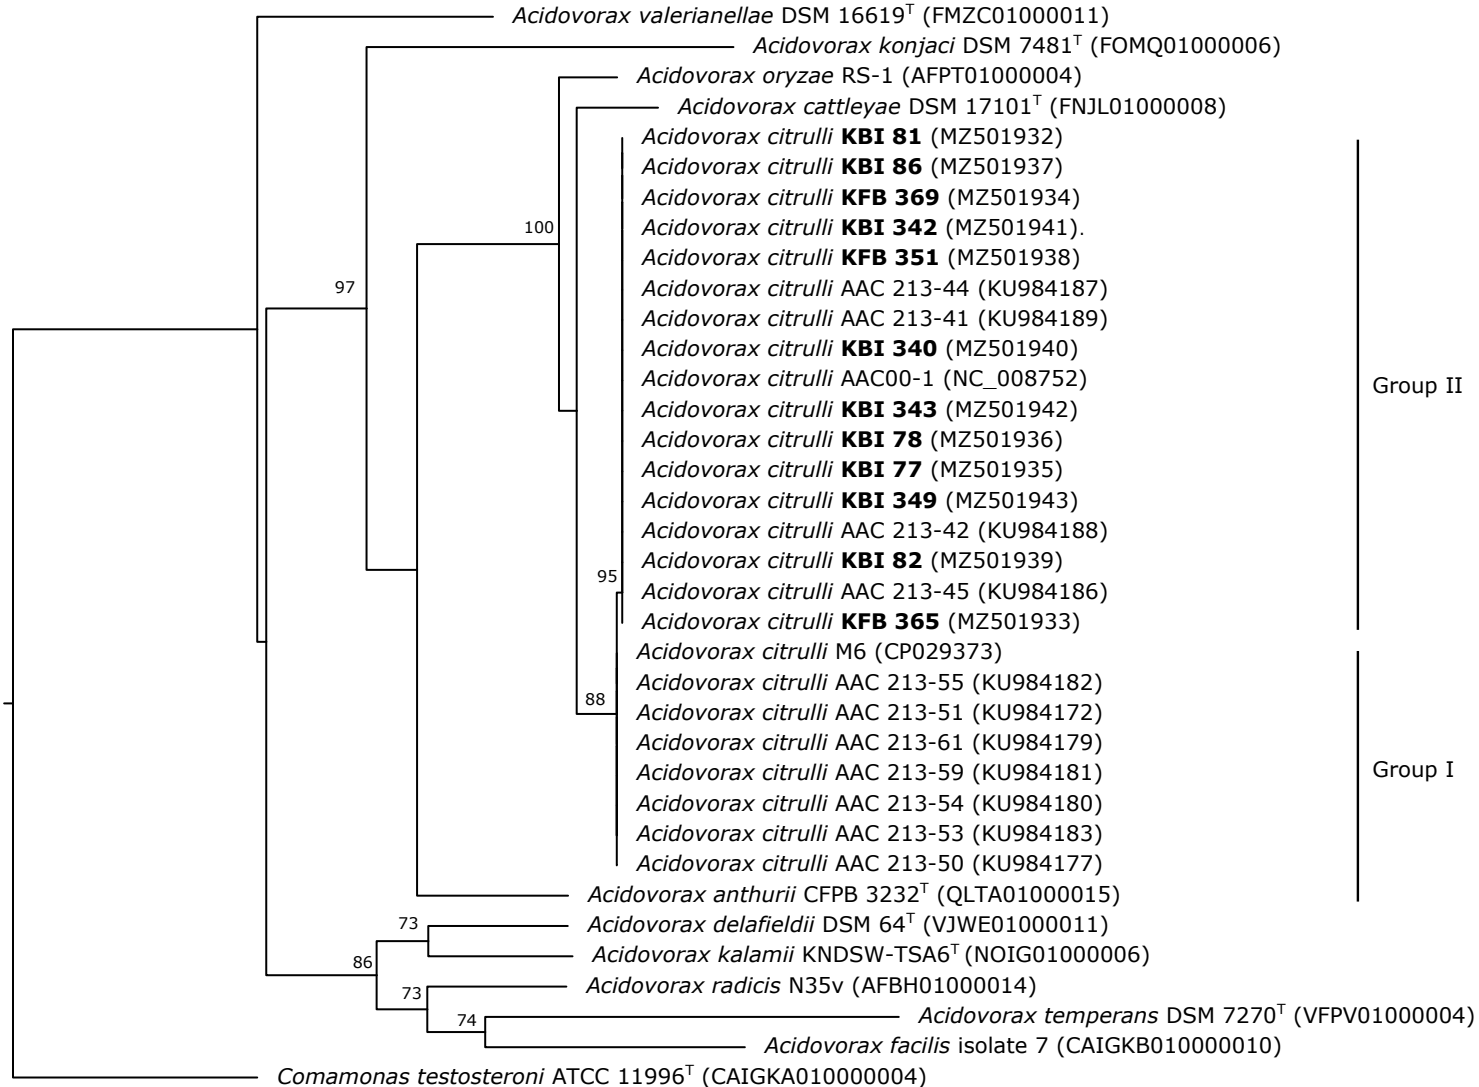

Supplement: s1 [file s1]

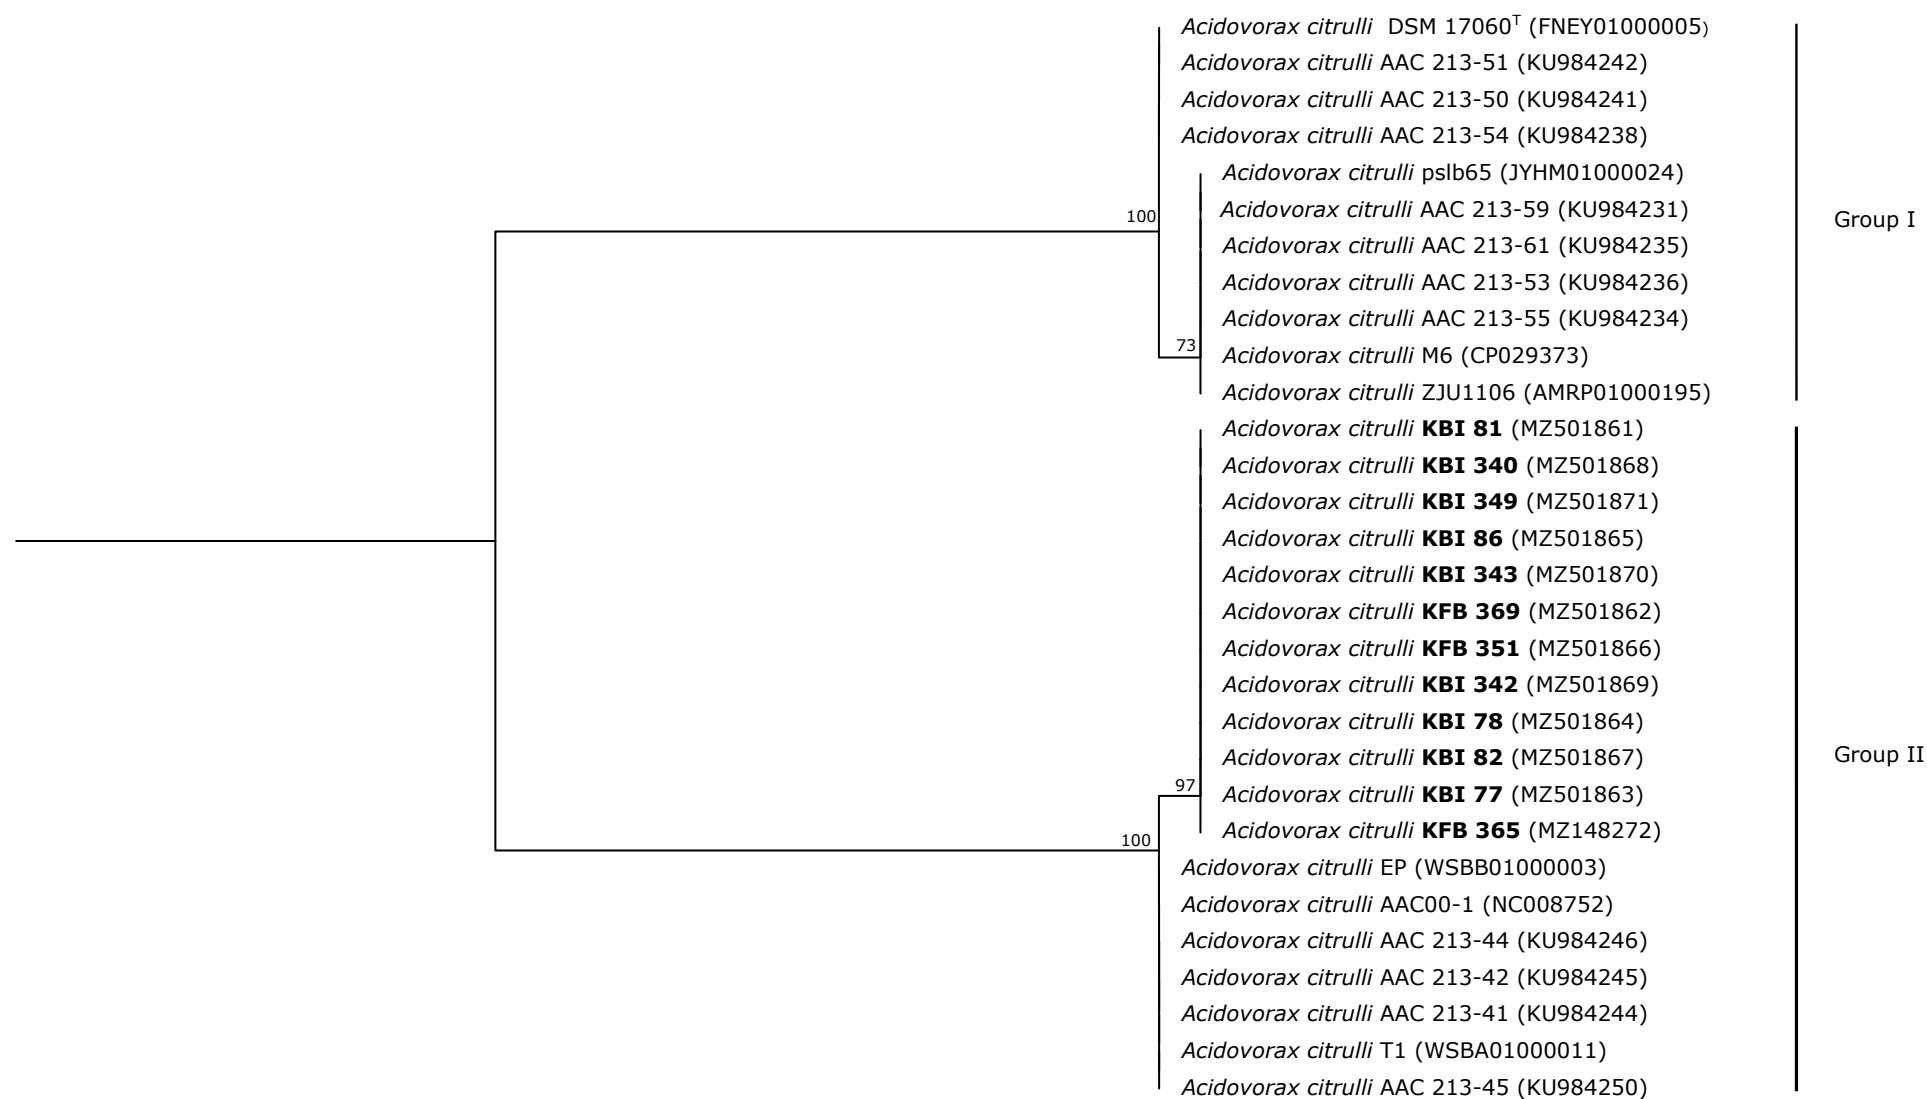

0.005

Supplement: s1 [file s1]

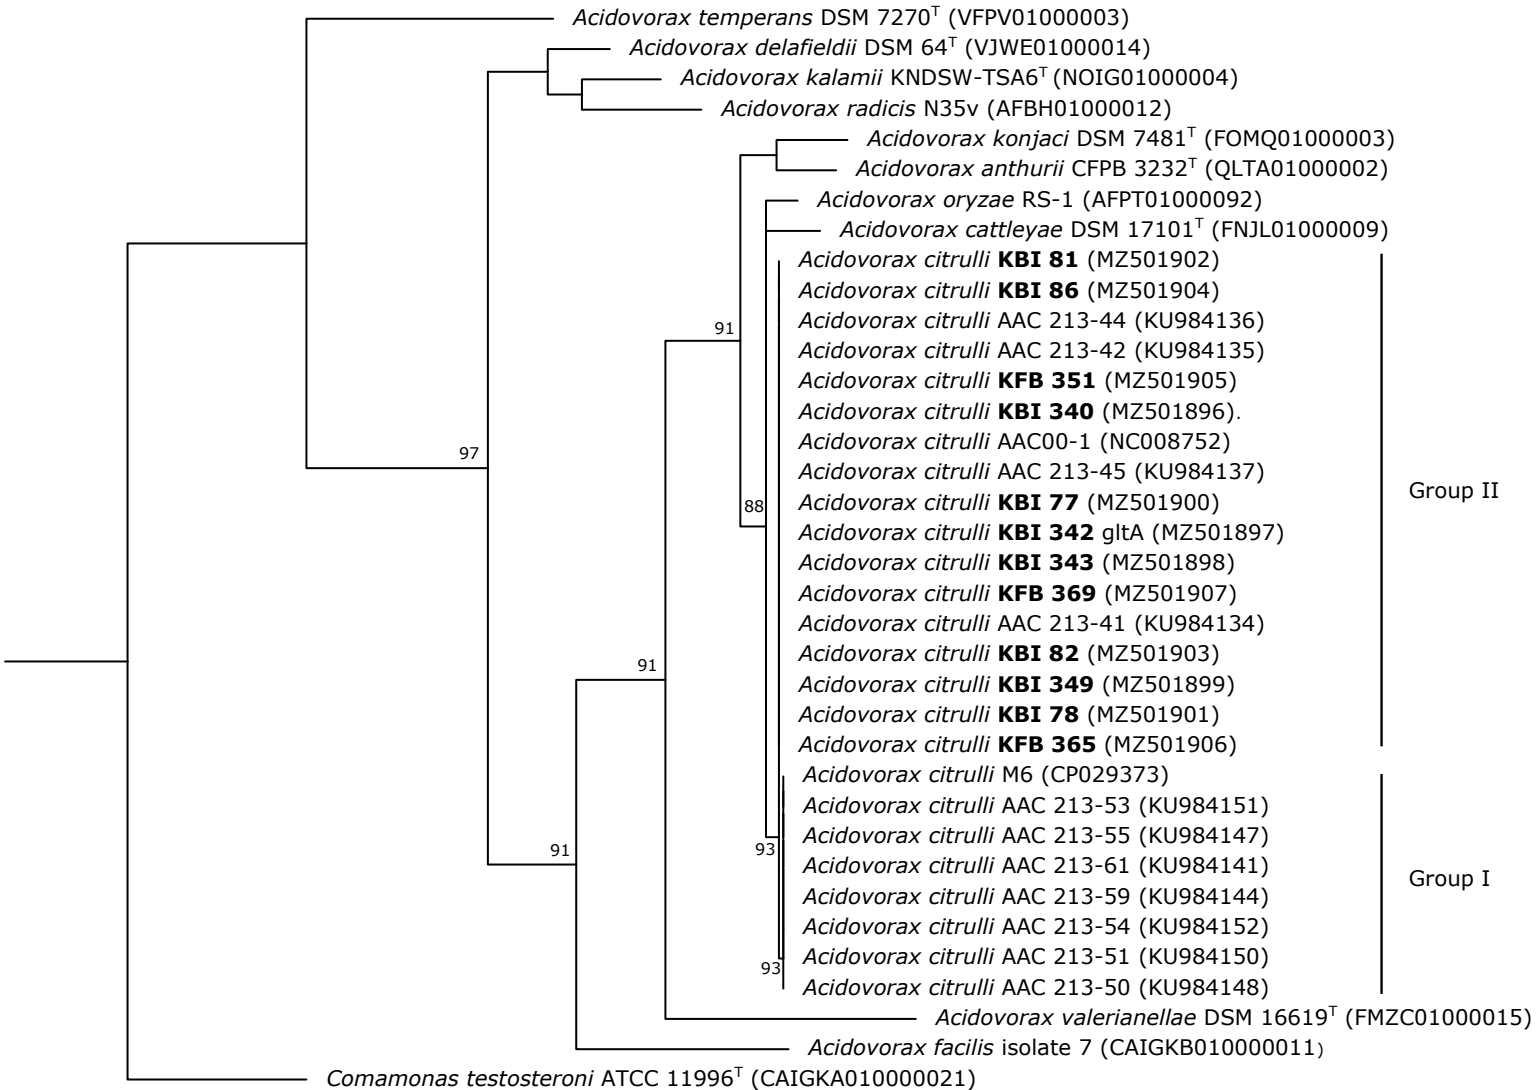

Supplement: s1 [file s1]

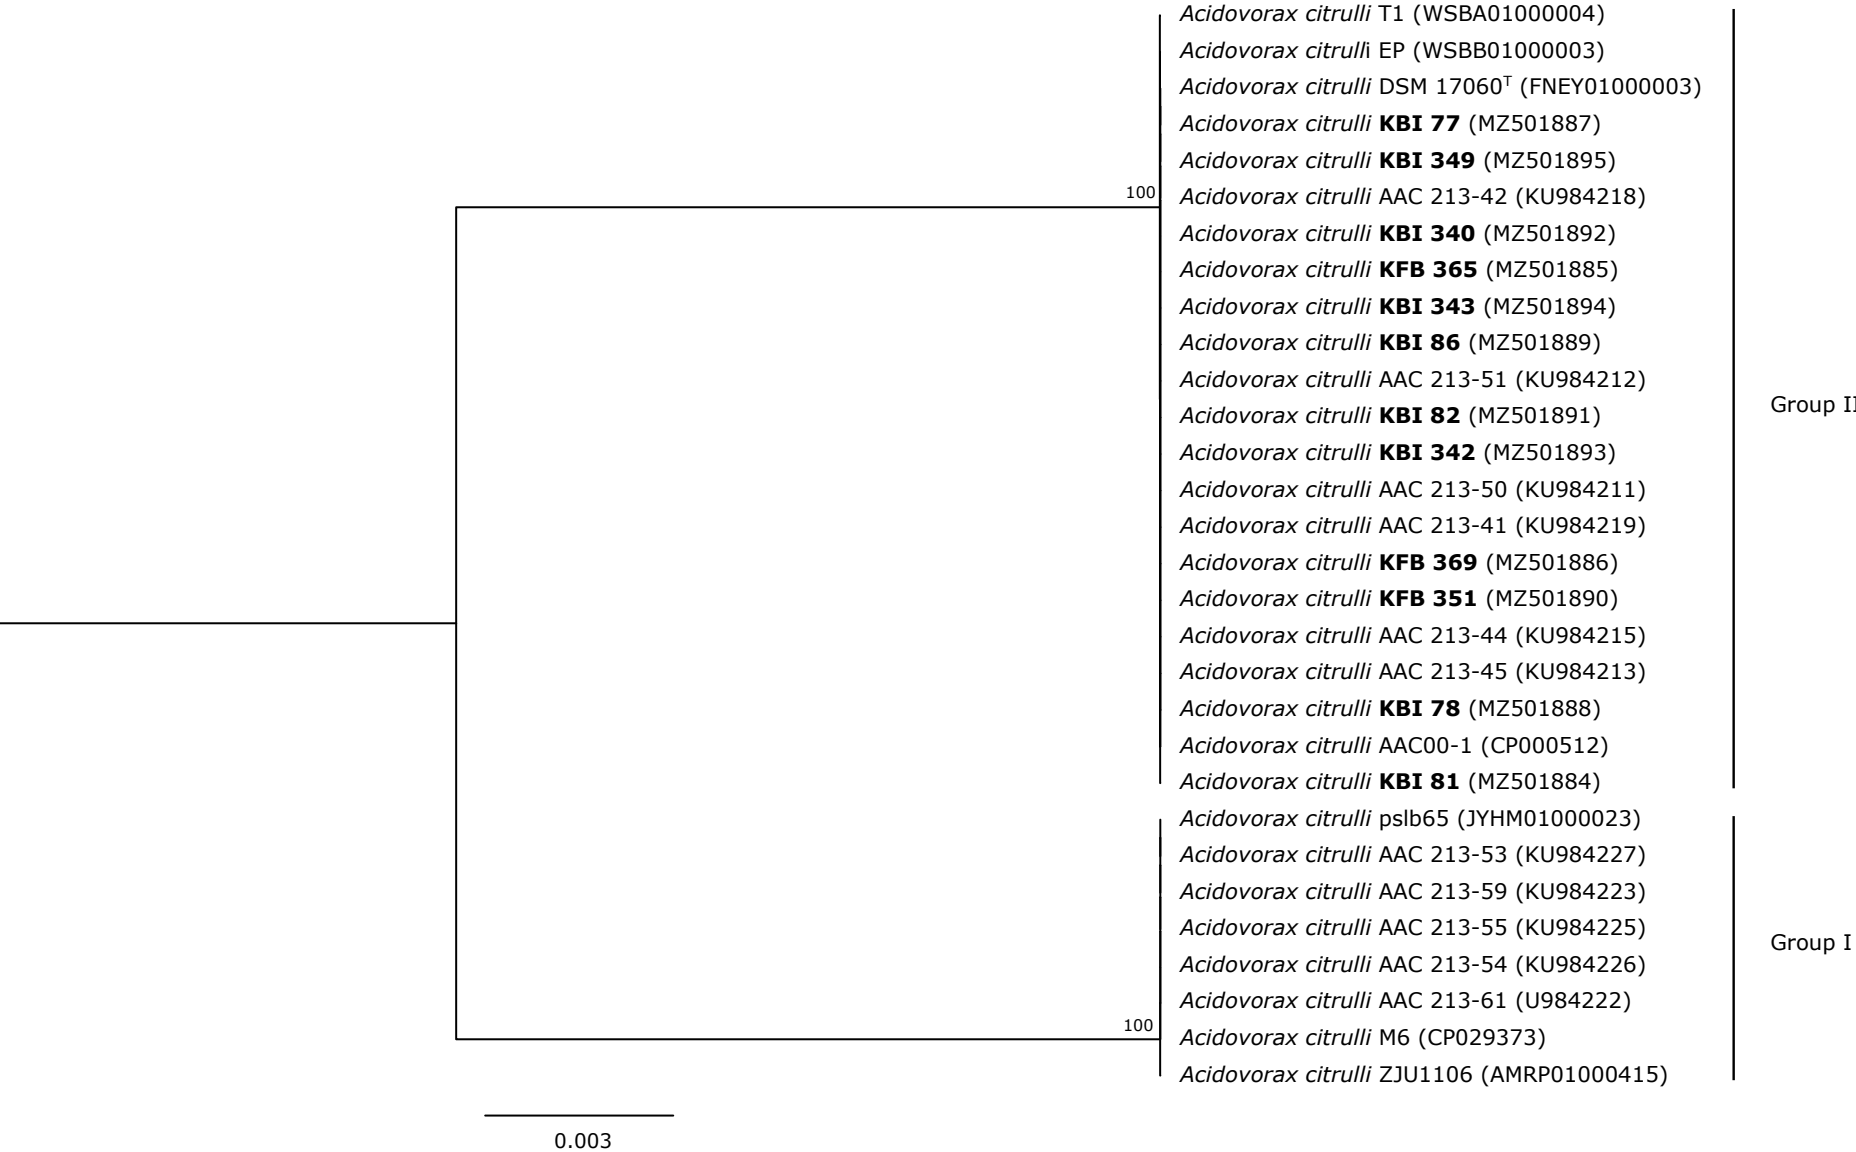

Supplement: s1 [file s1]
